# Supplementary material for: Obvious modulation of rectifying performance by conjugation breaking of the bridging fragment in donor–bridge–acceptor molecular diodes
Source: Royal Society of Chemistry journal article supplement (doi:10.1039/c7ra00254h), 2017-01-01
Supplement: c7ra00254h1.pdf [file c7ra00254h1.pdf]

## Supporting information for

### **Obvious modulation of rectifying performance by conjugation breaking of the bridging fragment in donor-bridge-acceptor molecular diodes**

Wen-Xia Su,<sup>a</sup> Xi Zuo,<sup>a</sup> Zhen Xie,<sup>a</sup> Guang-Ping Zhang,<sup>a,b,\*</sup> Chuan-Kui Wang<sup>a,†</sup>

*<sup>a</sup>Shandong Province Key Laboratory of Medical Physics and Image Processing Technology,  
School of Physics and Electronics, Shandong Normal University, Jinan 250014, China*

*<sup>b</sup>Institute of Materials and Clean Energy, Shandong Normal University, Jinan 250014, China*

Authors to whom correspondence should be addressed. E-mail: \*[zhangguangping@sdu.edu.cn](mailto:zhangguangping@sdu.edu.cn)

and †[ckwang@sdu.edu.cn](mailto:ckwang@sdu.edu.cn).

## 1. The optimized structure for bare AQ molecule (in .xyz format)

50

XYZ file

|   |           |          |           |
|---|-----------|----------|-----------|
| H | 3.029188  | 5.512366 | 14.554730 |
| S | 1.947984  | 6.145095 | 15.075720 |
| H | 4.233810  | 4.826522 | 16.453130 |
| C | 2.364281  | 5.905419 | 16.761830 |
| C | 3.529445  | 5.233316 | 17.195900 |
| H | 0.556850  | 6.948893 | 17.386370 |
| C | 1.465166  | 6.424781 | 17.722660 |
| C | 3.789758  | 5.083082 | 18.559080 |
| H | 4.696580  | 4.558830 | 18.895500 |
| C | 1.726046  | 6.274480 | 19.083050 |
| C | 2.892797  | 5.600785 | 19.526920 |
| H | 1.029285  | 6.676779 | 19.832670 |
| C | 3.130806  | 5.461817 | 20.921580 |
| C | 3.280572  | 5.372428 | 22.143260 |
| H | 5.307716  | 4.215783 | 23.500080 |
| C | 3.412987  | 5.291869 | 23.556120 |
| H | 1.534848  | 6.355994 | 23.974450 |
| C | 4.536753  | 4.651596 | 24.151760 |
| C | 2.419217  | 5.852867 | 24.394070 |
| C | 4.654620  | 4.580669 | 25.538450 |
| C | 2.540951  | 5.779434 | 25.786860 |
| H | 5.511382  | 4.093306 | 26.029340 |
| O | 0.484656  | 6.941482 | 26.120780 |
| C | 3.664384  | 5.140768 | 26.369210 |
| C | 1.462977  | 6.387958 | 26.626280 |
| C | 3.828368  | 5.045988 | 27.839690 |
| C | 1.625626  | 6.295623 | 28.105120 |
| O | 4.802798  | 4.491714 | 28.356470 |
| H | -0.222743 | 7.342803 | 28.450870 |
| C | 2.750410  | 5.658694 | 28.680160 |
| C | 0.637405  | 6.856585 | 28.936970 |
| C | 2.879727  | 5.588411 | 30.071300 |
| C | 0.763324  | 6.788420 | 30.324140 |
| H | 3.768548  | 5.085480 | 30.479710 |
| C | 1.891674  | 6.151120 | 30.908640 |
| H | -0.002315 | 7.223771 | 30.981650 |
| C | 2.042858  | 6.071129 | 32.321740 |
| C | 2.212878  | 5.980916 | 33.538970 |
| H | 4.340673  | 4.781910 | 34.606930 |
| C | 2.469667  | 5.841530 | 34.931570 |

|   |          |          |           |
|---|----------|----------|-----------|
| C | 3.646942 | 5.177048 | 35.362300 |
| H | 0.660353 | 6.868594 | 35.570120 |
| C | 1.572271 | 6.353071 | 35.902700 |
| C | 3.919001 | 5.027281 | 36.720910 |
| H | 4.830846 | 4.512128 | 37.054390 |
| C | 1.842735 | 6.204262 | 37.262980 |
| C | 3.017998 | 5.539868 | 37.682040 |
| H | 1.148037 | 6.600202 | 38.017270 |
| C | 3.299730 | 5.383188 | 39.082360 |
| N | 3.534507 | 5.251902 | 40.226700 |

## 2. The optimized structure for bare AC molecule (in .xyz format)

50

XYZ file

|   |          |          |           |
|---|----------|----------|-----------|
| H | 1.267409 | 6.522429 | 14.845410 |
| S | 2.434715 | 5.847538 | 14.987970 |
| C | 2.409872 | 5.782840 | 16.740400 |
| H | 4.286283 | 4.673631 | 16.763260 |
| H | 0.549139 | 6.874524 | 17.064260 |
| C | 3.484951 | 5.117239 | 17.372820 |
| C | 1.391197 | 6.349136 | 17.539480 |
| C | 3.538036 | 5.019912 | 18.761160 |
| C | 1.445025 | 6.251638 | 18.930760 |
| H | 4.374200 | 4.499464 | 19.249020 |
| H | 0.646095 | 6.696946 | 19.541470 |
| C | 2.520153 | 5.587430 | 19.569400 |
| C | 2.619912 | 5.484865 | 20.983080 |
| C | 2.795186 | 5.364355 | 22.197780 |
| H | 4.921763 | 4.122951 | 23.232700 |
| C | 3.048922 | 5.205724 | 23.585430 |
| C | 4.244294 | 4.511406 | 24.007540 |
| H | 1.263480 | 6.237585 | 24.231860 |
| C | 2.173534 | 5.707861 | 24.550280 |
| C | 4.525338 | 4.342268 | 25.343880 |
| H | 5.439259 | 3.810978 | 25.651660 |
| C | 2.438681 | 5.547183 | 25.939070 |
| C | 3.643035 | 4.847882 | 26.358280 |
| H | 0.649739 | 6.580555 | 26.604050 |
| C | 1.561582 | 6.049829 | 26.921720 |
| C | 3.904002 | 4.689327 | 27.729900 |
| H | 4.817311 | 4.159029 | 28.044870 |
| C | 1.822023 | 5.890739 | 28.291540 |

|   |          |          |           |
|---|----------|----------|-----------|
| C | 3.024952 | 5.191615 | 28.714830 |
| H | 0.023774 | 6.929880 | 28.973560 |
| C | 0.933220 | 6.399447 | 29.295750 |
| C | 3.277877 | 5.036620 | 30.110040 |
| H | 4.186620 | 4.509180 | 30.437450 |
| C | 1.201394 | 6.235619 | 30.635120 |
| C | 2.393995 | 5.542879 | 31.067410 |
| H | 0.517051 | 6.628806 | 31.399900 |
| C | 2.634233 | 5.404017 | 32.465080 |
| C | 2.778864 | 5.329922 | 33.688840 |
| H | 4.832251 | 4.190140 | 35.022550 |
| C | 2.943643 | 5.270548 | 35.102120 |
| H | 1.088774 | 6.332006 | 35.520250 |
| C | 4.079035 | 4.645331 | 35.680410 |
| C | 1.972585 | 5.850165 | 35.960990 |
| C | 4.243557 | 4.610200 | 37.065150 |
| C | 2.135412 | 5.816064 | 37.345610 |
| H | 5.125770 | 4.128542 | 37.509670 |
| C | 3.275052 | 5.198827 | 37.909760 |
| H | 1.383872 | 6.269634 | 38.006990 |
| C | 3.449415 | 5.175279 | 39.335660 |
| N | 3.592240 | 5.160756 | 40.502760 |

### 3. The optimized structure for bare AH molecule (in .xyz format)

52

XYZ file

|   |          |          |           |
|---|----------|----------|-----------|
| H | 3.039839 | 5.536257 | 14.683970 |
| S | 1.866258 | 6.130687 | 15.013800 |
| C | 2.282834 | 6.488910 | 16.682160 |
| H | 4.267126 | 5.582144 | 16.704630 |
| H | 0.361203 | 7.470967 | 16.993880 |
| C | 3.506985 | 6.126324 | 17.284940 |
| C | 1.319775 | 7.182860 | 17.450520 |
| C | 3.763426 | 6.451846 | 18.618520 |
| C | 1.576650 | 7.506402 | 18.781730 |
| H | 4.721461 | 6.166232 | 19.077940 |
| H | 0.825293 | 8.049371 | 19.374100 |
| C | 2.803406 | 7.147678 | 19.393950 |
| C | 3.036855 | 7.486525 | 20.755420 |
| C | 3.171542 | 7.805273 | 21.937840 |
| C | 3.336446 | 8.174443 | 23.303440 |
| H | 5.316662 | 7.297843 | 23.463280 |

|   |          |           |           |
|---|----------|-----------|-----------|
| H | 1.386265 | 9.125678  | 23.464660 |
| C | 2.315281 | 8.871782  | 23.994380 |
| C | 4.524820 | 7.846386  | 23.996440 |
| C | 2.492547 | 9.223812  | 25.335460 |
| C | 4.701354 | 8.209658  | 25.336480 |
| H | 6.518102 | 7.050503  | 25.578600 |
| H | 1.689937 | 9.762548  | 25.864420 |
| C | 3.678891 | 8.904091  | 26.018370 |
| H | 6.661184 | 8.765500  | 26.024830 |
| C | 5.979973 | 7.881522  | 26.077910 |
| C | 3.904044 | 9.293854  | 27.464670 |
| H | 4.464189 | 10.260090 | 27.492590 |
| C | 5.726241 | 7.554996  | 27.532750 |
| H | 7.271580 | 6.038093  | 27.676090 |
| H | 2.938281 | 9.487255  | 27.974050 |
| C | 6.483214 | 6.587443  | 28.215800 |
| C | 4.706206 | 8.251660  | 28.218990 |
| C | 6.251839 | 6.311814  | 29.565520 |
| C | 4.467478 | 7.973901  | 29.570710 |
| H | 6.847526 | 5.554416  | 30.093860 |
| H | 3.673390 | 8.510068  | 30.113250 |
| C | 5.235581 | 7.007624  | 30.264190 |
| C | 4.985806 | 6.733643  | 31.642160 |
| C | 4.773462 | 6.495449  | 32.833130 |
| C | 4.527618 | 6.220860  | 34.209080 |
| H | 2.879594 | 7.633733  | 34.369340 |
| H | 6.117538 | 4.742817  | 34.372470 |
| C | 3.491999 | 6.895583  | 34.906020 |
| C | 5.314148 | 5.268431  | 34.907550 |
| C | 3.251128 | 6.629034  | 36.253520 |
| C | 5.074989 | 5.000396  | 36.255080 |
| H | 2.448818 | 7.153810  | 36.790920 |
| H | 5.686254 | 4.262893  | 36.793960 |
| C | 4.041153 | 5.678843  | 36.939760 |
| C | 3.794357 | 5.403432  | 38.328110 |
| N | 3.592370 | 5.177485  | 39.464120 |

#### **4. The optimized structure for the central region of AQ junction (in**

**.xyz format)**

349

XYZ file

|    |          |          |          |
|----|----------|----------|----------|
| Au | 2.177184 | 1.011926 | 1.177289 |
|----|----------|----------|----------|

|    |           |           |          |
|----|-----------|-----------|----------|
| Au | 5.060942  | 1.011926  | 1.177289 |
| Au | 7.944700  | 1.011926  | 1.177289 |
| Au | 10.828460 | 1.011926  | 1.177289 |
| Au | 13.712220 | 1.011926  | 1.177289 |
| Au | 0.735304  | 3.509334  | 1.177289 |
| Au | 3.619063  | 3.509334  | 1.177289 |
| Au | 6.502821  | 3.509334  | 1.177289 |
| Au | 9.386579  | 3.509334  | 1.177289 |
| Au | 12.270340 | 3.509334  | 1.177289 |
| Au | -0.706575 | 6.006742  | 1.177289 |
| Au | 2.177184  | 6.006742  | 1.177289 |
| Au | 5.060942  | 6.006742  | 1.177289 |
| Au | 7.944700  | 6.006742  | 1.177289 |
| Au | 10.828460 | 6.006742  | 1.177289 |
| Au | -2.148454 | 8.504150  | 1.177289 |
| Au | 0.735304  | 8.504150  | 1.177289 |
| Au | 3.619063  | 8.504150  | 1.177289 |
| Au | 6.502821  | 8.504150  | 1.177289 |
| Au | 9.386579  | 8.504150  | 1.177289 |
| Au | -3.590333 | 11.001560 | 1.177289 |
| Au | -0.706575 | 11.001560 | 1.177289 |
| Au | 2.177184  | 11.001560 | 1.177289 |
| Au | 5.060942  | 11.001560 | 1.177289 |
| Au | 7.944700  | 11.001560 | 1.177289 |
| Au | 0.735304  | 1.844395  | 3.531868 |
| Au | 3.619063  | 1.844395  | 3.531868 |
| Au | 6.502821  | 1.844395  | 3.531868 |
| Au | 9.386579  | 1.844395  | 3.531868 |
| Au | 12.270340 | 1.844395  | 3.531868 |
| Au | -0.706575 | 4.341803  | 3.531868 |
| Au | 2.177184  | 4.341803  | 3.531868 |
| Au | 5.060942  | 4.341803  | 3.531868 |
| Au | 7.944700  | 4.341803  | 3.531868 |
| Au | 10.828460 | 4.341803  | 3.531868 |
| Au | -2.148454 | 6.839211  | 3.531868 |
| Au | 0.735304  | 6.839211  | 3.531868 |
| Au | 3.619063  | 6.839211  | 3.531868 |
| Au | 6.502821  | 6.839211  | 3.531868 |
| Au | 9.386579  | 6.839211  | 3.531868 |
| Au | -3.590333 | 9.336619  | 3.531868 |
| Au | -0.706575 | 9.336619  | 3.531868 |
| Au | 2.177184  | 9.336619  | 3.531868 |
| Au | 5.060942  | 9.336619  | 3.531868 |
| Au | 7.944700  | 9.336619  | 3.531868 |

|    |           |           |          |
|----|-----------|-----------|----------|
| Au | -5.032212 | 11.834030 | 3.531868 |
| Au | -2.148454 | 11.834030 | 3.531868 |
| Au | 0.735304  | 11.834030 | 3.531868 |
| Au | 3.619063  | 11.834030 | 3.531868 |
| Au | 6.502821  | 11.834030 | 3.531868 |
| Au | 0.735304  | 0.179457  | 5.886447 |
| Au | 3.619063  | 0.179457  | 5.886447 |
| Au | 6.502821  | 0.179457  | 5.886447 |
| Au | 9.386579  | 0.179457  | 5.886447 |
| Au | 12.270340 | 0.179457  | 5.886447 |
| Au | -0.706575 | 2.676864  | 5.886447 |
| Au | 2.177184  | 2.676864  | 5.886447 |
| Au | 5.060942  | 2.676864  | 5.886447 |
| Au | 7.944700  | 2.676864  | 5.886447 |
| Au | 10.828460 | 2.676864  | 5.886447 |
| Au | -2.148454 | 5.174272  | 5.886447 |
| Au | 0.735304  | 5.174272  | 5.886447 |
| Au | 3.619063  | 5.174272  | 5.886447 |
| Au | 6.502821  | 5.174272  | 5.886447 |
| Au | 9.386579  | 5.174272  | 5.886447 |
| Au | -3.590333 | 7.671680  | 5.886447 |
| Au | -0.706575 | 7.671680  | 5.886447 |
| Au | 2.177184  | 7.671680  | 5.886447 |
| Au | 5.060942  | 7.671680  | 5.886447 |
| Au | 7.944700  | 7.671680  | 5.886447 |
| Au | -5.032212 | 10.169090 | 5.886447 |
| Au | -2.148454 | 10.169090 | 5.886447 |
| Au | 0.735304  | 10.169090 | 5.886447 |
| Au | 3.619063  | 10.169090 | 5.886447 |
| Au | 6.502821  | 10.169090 | 5.886447 |
| Au | 2.177184  | 1.011926  | 8.241026 |
| Au | 5.060942  | 1.011926  | 8.241026 |
| Au | 7.944700  | 1.011926  | 8.241026 |
| Au | 10.828460 | 1.011926  | 8.241026 |
| Au | 13.712220 | 1.011926  | 8.241026 |
| Au | 0.735304  | 3.509334  | 8.241026 |
| Au | 3.619063  | 3.509334  | 8.241026 |
| Au | 6.502821  | 3.509334  | 8.241026 |
| Au | 9.386579  | 3.509334  | 8.241026 |
| Au | 12.270340 | 3.509334  | 8.241026 |
| Au | -0.706575 | 6.006742  | 8.241026 |
| Au | 2.177184  | 6.006742  | 8.241026 |
| Au | 5.060942  | 6.006742  | 8.241026 |
| Au | 7.944700  | 6.006742  | 8.241026 |

|    |           |           |           |
|----|-----------|-----------|-----------|
| Au | 10.828460 | 6.006742  | 8.241026  |
| Au | -2.148454 | 8.504150  | 8.241026  |
| Au | 0.735304  | 8.504150  | 8.241026  |
| Au | 3.619063  | 8.504150  | 8.241026  |
| Au | 6.502821  | 8.504150  | 8.241026  |
| Au | 9.386579  | 8.504150  | 8.241026  |
| Au | -3.590333 | 11.001560 | 8.241026  |
| Au | -0.706575 | 11.001560 | 8.241026  |
| Au | 2.177184  | 11.001560 | 8.241026  |
| Au | 5.060942  | 11.001560 | 8.241026  |
| Au | 7.944700  | 11.001560 | 8.241026  |
| Au | 12.273330 | 1.835502  | 10.685130 |
| Au | 3.627826  | 11.834710 | 10.685670 |
| Au | 0.723414  | 11.833920 | 10.689330 |
| Au | 10.822220 | 4.352072  | 10.689490 |
| Au | 6.494310  | 1.841651  | 10.691130 |
| Au | 7.943117  | 4.349984  | 10.691580 |
| Au | 6.508039  | 11.831000 | 10.705990 |
| Au | -3.579154 | 9.330169  | 10.706810 |
| Au | -2.138661 | 6.832598  | 10.706970 |
| Au | -0.696595 | 9.332141  | 10.707110 |
| Au | 0.732465  | 1.853730  | 10.707290 |
| Au | 5.051178  | 9.334446  | 10.707370 |
| Au | 9.385982  | 6.845434  | 10.708360 |
| Au | -2.154206 | 11.831810 | 10.708790 |
| Au | 3.622952  | 1.850030  | 10.709090 |
| Au | 6.500022  | 6.832470  | 10.709100 |
| Au | 7.932184  | 9.330090  | 10.709390 |
| Au | -5.032638 | 11.847880 | 10.709450 |
| Au | 9.383136  | 1.845270  | 10.713310 |
| Au | -0.723529 | 4.330815  | 10.718050 |
| Au | 2.177733  | 9.355473  | 10.718780 |
| Au | 0.745289  | 6.834047  | 10.729180 |
| Au | 2.182809  | 4.352458  | 10.732500 |
| Au | 3.613051  | 6.829113  | 10.732530 |
| Au | 5.065347  | 4.339173  | 10.732920 |
| Au | -5.029868 | 10.167910 | 13.113130 |
| Au | 2.175632  | 2.630340  | 13.138500 |
| Au | 5.102046  | 7.696813  | 13.138610 |
| Au | -0.731041 | 7.685896  | 13.142960 |
| Au | 10.820710 | 2.675461  | 13.143690 |
| Au | 9.383139  | 0.185587  | 13.144020 |
| Au | 0.607539  | 5.090908  | 13.146970 |
| Au | 7.944942  | 2.675599  | 13.147440 |



|    |           |           |           |
|----|-----------|-----------|-----------|
| Au | 2.186251  | 7.823369  | 13.149240 |
| Au | 12.270850 | 0.179230  | 13.169620 |
| Au | 6.499466  | 0.176389  | 13.171020 |
| Au | 9.388128  | 5.178594  | 13.171260 |
| Au | -3.591234 | 7.668739  | 13.178350 |
| Au | -2.146431 | 10.171960 | 13.178690 |
| Au | 6.508409  | 10.181610 | 13.179820 |
| Au | 0.727911  | 0.169070  | 13.180080 |
| Au | 7.958939  | 7.665737  | 13.184090 |
| Au | 3.630664  | 0.171262  | 13.184420 |
| Au | -0.740841 | 2.626687  | 13.194550 |
| Au | 3.645610  | 10.223460 | 13.194780 |
| Au | -2.197589 | 5.168363  | 13.195070 |
| Au | 0.715693  | 10.213530 | 13.195190 |
| Au | 3.724022  | 5.114251  | 13.196210 |
| Au | 5.086227  | 2.637304  | 13.202990 |
| Au | 6.551021  | 5.171915  | 13.203070 |
| S  | 2.197759  | 5.994696  | 14.956670 |
| H  | 4.406653  | 4.729994  | 16.453650 |
| C  | 2.533370  | 5.807366  | 16.694139 |
| C  | 3.685745  | 5.145425  | 17.176920 |
| H  | 0.703586  | 6.860994  | 17.223801 |
| C  | 1.597175  | 6.347274  | 17.608219 |
| C  | 3.892868  | 5.027535  | 18.554939 |
| H  | 4.787562  | 4.513282  | 18.935511 |
| C  | 1.807858  | 6.227140  | 18.981939 |
| C  | 2.960067  | 5.564105  | 19.483450 |
| H  | 1.080451  | 6.646207  | 19.692610 |
| C  | 3.152278  | 5.451702  | 20.893169 |
| C  | 3.265588  | 5.382828  | 22.122110 |
| H  | 5.287127  | 4.226115  | 23.488991 |
| C  | 3.392341  | 5.304558  | 23.541130 |
| H  | 1.516109  | 6.369196  | 23.976170 |
| C  | 4.515711  | 4.662574  | 24.139450 |
| C  | 2.402908  | 5.863435  | 24.386551 |
| C  | 4.636007  | 4.588826  | 25.526800 |
| C  | 2.526967  | 5.787157  | 25.780720 |
| H  | 5.494054  | 4.098846  | 26.012911 |
| O  | 0.471418  | 6.948509  | 26.127831 |
| C  | 3.649552  | 5.147342  | 26.363180 |
| C  | 1.451922  | 6.393568  | 26.626190 |
| C  | 3.815933  | 5.050347  | 27.837601 |
| C  | 1.617508  | 6.298988  | 28.107491 |
| O  | 4.790551  | 4.494297  | 28.349939 |

|    |           |           |           |
|----|-----------|-----------|-----------|
| H  | -0.230255 | 7.345501  | 28.447580 |
| C  | 2.741426  | 5.662457  | 28.684759 |
| C  | 0.628000  | 6.860534  | 28.937410 |
| C  | 2.868371  | 5.594246  | 30.078030 |
| C  | 0.749482  | 6.795220  | 30.324789 |
| H  | 3.754863  | 5.092840  | 30.494940 |
| C  | 1.877133  | 6.159124  | 30.912029 |
| H  | -0.018236 | 7.231565  | 30.979931 |
| C  | 2.019052  | 6.085569  | 32.326550 |
| C  | 2.169215  | 6.007601  | 33.547180 |
| H  | 4.305278  | 4.807254  | 34.566448 |
| C  | 2.436537  | 5.862303  | 34.935951 |
| C  | 3.623584  | 5.193677  | 35.336689 |
| H  | 0.632306  | 6.883358  | 35.610592 |
| C  | 1.549932  | 6.365742  | 35.923561 |
| C  | 3.918196  | 5.030196  | 36.686310 |
| H  | 4.833410  | 4.514207  | 37.006180 |
| C  | 1.840144  | 6.204620  | 37.277561 |
| C  | 3.025396  | 5.535699  | 37.657940 |
| H  | 1.163228  | 6.588291  | 38.054211 |
| C  | 3.336878  | 5.360705  | 39.035049 |
| N  | 3.624071  | 5.198657  | 40.159710 |
| Au | -0.729261 | 7.709664  | 42.260899 |
| Au | 3.596967  | 0.208855  | 42.265911 |
| Au | 7.930718  | 7.714881  | 42.265980 |
| Au | -0.725408 | 2.716742  | 42.268120 |
| Au | -2.172917 | 5.210120  | 42.268341 |
| Au | 7.927125  | 2.712877  | 42.268360 |
| Au | 3.596604  | 10.204330 | 42.268501 |
| Au | 0.712998  | 10.210240 | 42.268688 |
| Au | 0.707577  | 0.212105  | 42.271069 |
| Au | 6.483103  | 10.216580 | 42.271320 |
| Au | 9.378925  | 5.209035  | 42.271351 |
| Au | 6.489262  | 0.206678  | 42.271450 |
| Au | 0.685587  | 5.212813  | 42.282429 |
| Au | 2.140796  | 7.734145  | 42.284340 |
| Au | -5.063008 | 10.212620 | 42.292389 |
| Au | 10.809120 | 2.722060  | 42.295120 |
| Au | 9.358398  | 0.211911  | 42.296471 |
| Au | -3.609297 | 7.698734  | 42.298168 |
| Au | -2.160127 | 10.209540 | 42.298790 |
| Au | 2.142060  | 2.682751  | 42.300999 |
| Au | 12.255070 | 0.214972  | 42.301819 |
| Au | 5.060625  | 7.738746  | 42.302711 |

|    |           |           |           |
|----|-----------|-----------|-----------|
| Au | 5.059816  | 2.679904  | 42.319309 |
| Au | 6.522253  | 5.212721  | 42.319759 |
| Au | 3.603330  | 5.209548  | 42.417728 |
| Au | -3.613579 | 9.375192  | 44.740410 |
| Au | -2.168356 | 6.878766  | 44.741890 |
| Au | 12.249820 | 1.884648  | 44.742008 |
| Au | -0.729421 | 9.371441  | 44.742088 |
| Au | 3.595942  | 11.870790 | 44.742111 |
| Au | 9.368367  | 1.880508  | 44.742580 |
| Au | 0.711968  | 6.877764  | 44.743099 |
| Au | 3.594085  | 1.880724  | 44.743179 |
| Au | 6.481308  | 6.880965  | 44.743309 |
| Au | 9.362251  | 6.877994  | 44.743790 |
| Au | 7.923016  | 9.373565  | 44.744061 |
| Au | -5.053036 | 11.872810 | 44.744068 |
| Au | -2.172929 | 11.873790 | 44.744129 |
| Au | 6.484260  | 11.870830 | 44.746849 |
| Au | 10.809430 | 4.384894  | 44.746910 |
| Au | 2.139544  | 4.372811  | 44.746941 |
| Au | 0.709422  | 11.866820 | 44.747059 |
| Au | -0.731731 | 4.377726  | 44.747471 |
| Au | 2.155325  | 9.378930  | 44.747791 |
| Au | 3.595603  | 6.894994  | 44.747952 |
| Au | 0.706425  | 1.880946  | 44.748402 |
| Au | 5.037051  | 9.382710  | 44.748562 |
| Au | 6.493127  | 1.877433  | 44.749691 |
| Au | 7.933742  | 4.371830  | 44.749809 |
| Au | 5.057163  | 4.369736  | 44.764721 |
| Au | 2.154234  | 1.050646  | 47.216160 |
| Au | 5.037992  | 1.050646  | 47.216160 |
| Au | 7.921750  | 1.050646  | 47.216160 |
| Au | 10.805510 | 1.050646  | 47.216160 |
| Au | 13.689270 | 1.050646  | 47.216160 |
| Au | 0.712355  | 3.548054  | 47.216160 |
| Au | 3.596113  | 3.548054  | 47.216160 |
| Au | 6.479871  | 3.548054  | 47.216160 |
| Au | 9.363629  | 3.548054  | 47.216160 |
| Au | 12.247390 | 3.548054  | 47.216160 |
| Au | -0.729525 | 6.045462  | 47.216160 |
| Au | 2.154234  | 6.045462  | 47.216160 |
| Au | 5.037992  | 6.045462  | 47.216160 |
| Au | 7.921750  | 6.045462  | 47.216160 |
| Au | 10.805510 | 6.045462  | 47.216160 |
| Au | -2.171404 | 8.542870  | 47.216160 |

|    |           |           |           |
|----|-----------|-----------|-----------|
| Au | 0.712355  | 8.542870  | 47.216160 |
| Au | 3.596113  | 8.542870  | 47.216160 |
| Au | 6.479871  | 8.542870  | 47.216160 |
| Au | 9.363629  | 8.542870  | 47.216160 |
| Au | -3.613283 | 11.040280 | 47.216160 |
| Au | -0.729525 | 11.040280 | 47.216160 |
| Au | 2.154234  | 11.040280 | 47.216160 |
| Au | 5.037992  | 11.040280 | 47.216160 |
| Au | 7.921750  | 11.040280 | 47.216160 |
| Au | 0.712355  | 0.218177  | 49.570728 |
| Au | 3.596113  | 0.218177  | 49.570728 |
| Au | 6.479871  | 0.218177  | 49.570728 |
| Au | 9.363629  | 0.218177  | 49.570728 |
| Au | 12.247390 | 0.218177  | 49.570728 |
| Au | -0.729525 | 2.715585  | 49.570728 |
| Au | 2.154234  | 2.715585  | 49.570728 |
| Au | 5.037992  | 2.715585  | 49.570728 |
| Au | 7.921750  | 2.715585  | 49.570728 |
| Au | 10.805510 | 2.715585  | 49.570728 |
| Au | -2.171404 | 5.212993  | 49.570728 |
| Au | 0.712355  | 5.212993  | 49.570728 |
| Au | 3.596113  | 5.212993  | 49.570728 |
| Au | 6.479871  | 5.212993  | 49.570728 |
| Au | 9.363629  | 5.212993  | 49.570728 |
| Au | -3.613283 | 7.710400  | 49.570728 |
| Au | -0.729525 | 7.710400  | 49.570728 |
| Au | 2.154234  | 7.710400  | 49.570728 |
| Au | 5.037992  | 7.710400  | 49.570728 |
| Au | 7.921750  | 7.710400  | 49.570728 |
| Au | -5.055162 | 10.207810 | 49.570728 |
| Au | -2.171404 | 10.207810 | 49.570728 |
| Au | 0.712355  | 10.207810 | 49.570728 |
| Au | 3.596113  | 10.207810 | 49.570728 |
| Au | 6.479871  | 10.207810 | 49.570728 |
| Au | 0.712355  | 1.883115  | 51.925308 |
| Au | 3.596113  | 1.883115  | 51.925308 |
| Au | 6.479871  | 1.883115  | 51.925308 |
| Au | 9.363629  | 1.883115  | 51.925308 |
| Au | 12.247390 | 1.883115  | 51.925308 |
| Au | -0.729525 | 4.380523  | 51.925308 |
| Au | 2.154234  | 4.380523  | 51.925308 |
| Au | 5.037992  | 4.380523  | 51.925308 |
| Au | 7.921750  | 4.380523  | 51.925308 |
| Au | 10.805510 | 4.380523  | 51.925308 |

|    |           |           |           |
|----|-----------|-----------|-----------|
| Au | -2.171404 | 6.877931  | 51.925308 |
| Au | 0.712355  | 6.877931  | 51.925308 |
| Au | 3.596113  | 6.877931  | 51.925308 |
| Au | 6.479871  | 6.877931  | 51.925308 |
| Au | 9.363629  | 6.877931  | 51.925308 |
| Au | -3.613283 | 9.375339  | 51.925308 |
| Au | -0.729525 | 9.375339  | 51.925308 |
| Au | 2.154234  | 9.375339  | 51.925308 |
| Au | 5.037992  | 9.375339  | 51.925308 |
| Au | 7.921750  | 9.375339  | 51.925308 |
| Au | -5.055162 | 11.872750 | 51.925308 |
| Au | -2.171404 | 11.872750 | 51.925308 |
| Au | 0.712355  | 11.872750 | 51.925308 |
| Au | 3.596113  | 11.872750 | 51.925308 |
| Au | 6.479871  | 11.872750 | 51.925308 |
| Au | 2.154234  | 1.050646  | 54.279888 |
| Au | 5.037992  | 1.050646  | 54.279888 |
| Au | 7.921750  | 1.050646  | 54.279888 |
| Au | 10.805510 | 1.050646  | 54.279888 |
| Au | 13.689270 | 1.050646  | 54.279888 |
| Au | 0.712355  | 3.548054  | 54.279888 |
| Au | 3.596113  | 3.548054  | 54.279888 |
| Au | 6.479871  | 3.548054  | 54.279888 |
| Au | 9.363629  | 3.548054  | 54.279888 |
| Au | 12.247390 | 3.548054  | 54.279888 |
| Au | -0.729525 | 6.045462  | 54.279888 |
| Au | 2.154234  | 6.045462  | 54.279888 |
| Au | 5.037992  | 6.045462  | 54.279888 |
| Au | 7.921750  | 6.045462  | 54.279888 |
| Au | 10.805510 | 6.045462  | 54.279888 |
| Au | -2.171404 | 8.542870  | 54.279888 |
| Au | 0.712355  | 8.542870  | 54.279888 |
| Au | 3.596113  | 8.542870  | 54.279888 |
| Au | 6.479871  | 8.542870  | 54.279888 |
| Au | 9.363629  | 8.542870  | 54.279888 |
| Au | -3.613283 | 11.040280 | 54.279888 |
| Au | -0.729525 | 11.040280 | 54.279888 |
| Au | 2.154234  | 11.040280 | 54.279888 |
| Au | 5.037992  | 11.040280 | 54.279888 |
| Au | 7.921750  | 11.040280 | 54.279888 |

## 5. The optimized structure for the central region of AC junction (in

### .xyz format)

349

XYZ file

|    |           |           |          |
|----|-----------|-----------|----------|
| Au | 2.177184  | 1.011926  | 1.177289 |
| Au | 5.060942  | 1.011926  | 1.177289 |
| Au | 7.944700  | 1.011926  | 1.177289 |
| Au | 10.828460 | 1.011926  | 1.177289 |
| Au | 13.712220 | 1.011926  | 1.177289 |
| Au | 0.735304  | 3.509334  | 1.177289 |
| Au | 3.619063  | 3.509334  | 1.177289 |
| Au | 6.502821  | 3.509334  | 1.177289 |
| Au | 9.386579  | 3.509334  | 1.177289 |
| Au | 12.270340 | 3.509334  | 1.177289 |
| Au | -0.706575 | 6.006742  | 1.177289 |
| Au | 2.177184  | 6.006742  | 1.177289 |
| Au | 5.060942  | 6.006742  | 1.177289 |
| Au | 7.944700  | 6.006742  | 1.177289 |
| Au | 10.828460 | 6.006742  | 1.177289 |
| Au | -2.148454 | 8.504150  | 1.177289 |
| Au | 0.735304  | 8.504150  | 1.177289 |
| Au | 3.619063  | 8.504150  | 1.177289 |
| Au | 6.502821  | 8.504150  | 1.177289 |
| Au | 9.386579  | 8.504150  | 1.177289 |
| Au | -3.590333 | 11.001560 | 1.177289 |
| Au | -0.706575 | 11.001560 | 1.177289 |
| Au | 2.177184  | 11.001560 | 1.177289 |
| Au | 5.060942  | 11.001560 | 1.177289 |
| Au | 7.944700  | 11.001560 | 1.177289 |
| Au | 0.735304  | 1.844395  | 3.531868 |
| Au | 3.619063  | 1.844395  | 3.531868 |
| Au | 6.502821  | 1.844395  | 3.531868 |
| Au | 9.386579  | 1.844395  | 3.531868 |
| Au | 12.270340 | 1.844395  | 3.531868 |
| Au | -0.706575 | 4.341803  | 3.531868 |
| Au | 2.177184  | 4.341803  | 3.531868 |
| Au | 5.060942  | 4.341803  | 3.531868 |
| Au | 7.944700  | 4.341803  | 3.531868 |
| Au | 10.828460 | 4.341803  | 3.531868 |
| Au | -2.148454 | 6.839211  | 3.531868 |
| Au | 0.735304  | 6.839211  | 3.531868 |
| Au | 3.619063  | 6.839211  | 3.531868 |

|    |           |           |          |
|----|-----------|-----------|----------|
| Au | 6.502821  | 6.839211  | 3.531868 |
| Au | 9.386579  | 6.839211  | 3.531868 |
| Au | -3.590333 | 9.336619  | 3.531868 |
| Au | -0.706575 | 9.336619  | 3.531868 |
| Au | 2.177184  | 9.336619  | 3.531868 |
| Au | 5.060942  | 9.336619  | 3.531868 |
| Au | 7.944700  | 9.336619  | 3.531868 |
| Au | -5.032212 | 11.834030 | 3.531868 |
| Au | -2.148454 | 11.834030 | 3.531868 |
| Au | 0.735304  | 11.834030 | 3.531868 |
| Au | 3.619063  | 11.834030 | 3.531868 |
| Au | 6.502821  | 11.834030 | 3.531868 |
| Au | 0.735304  | 0.179457  | 5.886447 |
| Au | 3.619063  | 0.179457  | 5.886447 |
| Au | 6.502821  | 0.179457  | 5.886447 |
| Au | 9.386579  | 0.179457  | 5.886447 |
| Au | 12.270340 | 0.179457  | 5.886447 |
| Au | -0.706575 | 2.676864  | 5.886447 |
| Au | 2.177184  | 2.676864  | 5.886447 |
| Au | 5.060942  | 2.676864  | 5.886447 |
| Au | 7.944700  | 2.676864  | 5.886447 |
| Au | 10.828460 | 2.676864  | 5.886447 |
| Au | -2.148454 | 5.174272  | 5.886447 |
| Au | 0.735304  | 5.174272  | 5.886447 |
| Au | 3.619063  | 5.174272  | 5.886447 |
| Au | 6.502821  | 5.174272  | 5.886447 |
| Au | 9.386579  | 5.174272  | 5.886447 |
| Au | -3.590333 | 7.671680  | 5.886447 |
| Au | -0.706575 | 7.671680  | 5.886447 |
| Au | 2.177184  | 7.671680  | 5.886447 |
| Au | 5.060942  | 7.671680  | 5.886447 |
| Au | 7.944700  | 7.671680  | 5.886447 |
| Au | -5.032212 | 10.169090 | 5.886447 |
| Au | -2.148454 | 10.169090 | 5.886447 |
| Au | 0.735304  | 10.169090 | 5.886447 |
| Au | 3.619063  | 10.169090 | 5.886447 |
| Au | 6.502821  | 10.169090 | 5.886447 |
| Au | 2.177184  | 1.011926  | 8.241026 |
| Au | 5.060942  | 1.011926  | 8.241026 |
| Au | 7.944700  | 1.011926  | 8.241026 |
| Au | 10.828460 | 1.011926  | 8.241026 |
| Au | 13.712220 | 1.011926  | 8.241026 |
| Au | 0.735304  | 3.509334  | 8.241026 |
| Au | 3.619063  | 3.509334  | 8.241026 |

|    |           |           |           |
|----|-----------|-----------|-----------|
| Au | 6.502821  | 3.509334  | 8.241026  |
| Au | 9.386579  | 3.509334  | 8.241026  |
| Au | 12.270340 | 3.509334  | 8.241026  |
| Au | -0.706575 | 6.006742  | 8.241026  |
| Au | 2.177184  | 6.006742  | 8.241026  |
| Au | 5.060942  | 6.006742  | 8.241026  |
| Au | 7.944700  | 6.006742  | 8.241026  |
| Au | 10.828460 | 6.006742  | 8.241026  |
| Au | -2.148454 | 8.504150  | 8.241026  |
| Au | 0.735304  | 8.504150  | 8.241026  |
| Au | 3.619063  | 8.504150  | 8.241026  |
| Au | 6.502821  | 8.504150  | 8.241026  |
| Au | 9.386579  | 8.504150  | 8.241026  |
| Au | -3.590333 | 11.001560 | 8.241026  |
| Au | -0.706575 | 11.001560 | 8.241026  |
| Au | 2.177184  | 11.001560 | 8.241026  |
| Au | 5.060942  | 11.001560 | 8.241026  |
| Au | 7.944700  | 11.001560 | 8.241026  |
| Au | 12.277680 | 1.841054  | 10.680700 |
| Au | 10.822660 | 4.350571  | 10.680820 |
| Au | 3.628999  | 11.839480 | 10.680950 |
| Au | 0.722382  | 11.841650 | 10.681790 |
| Au | 7.937716  | 4.354247  | 10.687490 |
| Au | 6.487132  | 1.845618  | 10.688320 |
| Au | 6.511270  | 11.830740 | 10.702170 |
| Au | 9.385233  | 6.847016  | 10.702370 |
| Au | -2.157195 | 11.832450 | 10.703270 |
| Au | 5.047377  | 9.335987  | 10.705470 |
| Au | 0.731500  | 1.858255  | 10.707170 |
| Au | -0.694527 | 9.334374  | 10.708450 |
| Au | -2.141611 | 6.830489  | 10.710380 |
| Au | 6.495069  | 6.832700  | 10.710800 |
| Au | 3.619872  | 1.854590  | 10.711540 |
| Au | -3.575807 | 9.328773  | 10.713020 |
| Au | 9.382291  | 1.847831  | 10.713030 |
| Au | -5.031895 | 11.848530 | 10.713230 |
| Au | 7.932463  | 9.329434  | 10.713450 |
| Au | 2.176485  | 9.362221  | 10.715430 |
| Au | -0.718810 | 4.335887  | 10.724260 |
| Au | 0.743162  | 6.830839  | 10.735960 |
| Au | 5.058177  | 4.342826  | 10.736290 |
| Au | 3.610367  | 6.831018  | 10.738060 |
| Au | 2.181350  | 4.355754  | 10.748750 |
| Au | -5.028951 | 10.168190 | 13.119290 |



|    |           |           |           |
|----|-----------|-----------|-----------|
| Au | 5.092484  | 7.696388  | 13.139360 |
| Au | 2.172148  | 2.636340  | 13.141500 |
| Au | -0.741688 | 7.692430  | 13.143410 |
| Au | 7.939899  | 2.680230  | 13.145520 |
| Au | 10.818100 | 2.675525  | 13.146780 |
| Au | 9.383054  | 0.189521  | 13.147610 |
| Au | 2.178533  | 7.839583  | 13.152120 |
| Au | 9.381628  | 5.170838  | 13.163850 |
| Au | 12.264610 | 0.182963  | 13.164960 |
| Au | 6.503446  | 0.185341  | 13.166150 |
| Au | 0.592514  | 5.090990  | 13.174830 |
| Au | 6.504957  | 10.180500 | 13.174900 |
| Au | 0.727211  | 0.170980  | 13.176190 |
| Au | -2.149061 | 10.182370 | 13.178410 |
| Au | -3.602636 | 7.667461  | 13.179790 |
| Au | 7.952880  | 7.665081  | 13.180580 |
| Au | 3.629278  | 0.175926  | 13.182150 |
| Au | 3.644413  | 10.230950 | 13.194910 |
| Au | 0.709802  | 10.227800 | 13.195540 |
| Au | -0.746992 | 2.623392  | 13.198680 |
| Au | -2.212784 | 5.168152  | 13.199250 |
| Au | 6.543346  | 5.175056  | 13.205820 |
| Au | 5.081118  | 2.641191  | 13.207830 |
| Au | 3.721738  | 5.115191  | 13.222790 |
| S  | 2.130363  | 6.024513  | 14.960700 |
| H  | 4.146884  | 4.735540  | 16.619221 |
| C  | 2.276807  | 5.836216  | 16.726940 |
| H  | 0.426318  | 6.913265  | 17.137730 |
| C  | 3.383181  | 5.160393  | 17.290239 |
| C  | 1.287503  | 6.386706  | 17.577940 |
| C  | 3.496272  | 5.042436  | 18.677641 |
| C  | 1.406342  | 6.264546  | 18.965380 |
| H  | 4.357460  | 4.519441  | 19.116529 |
| C  | 2.515085  | 5.591976  | 19.546690 |
| H  | 0.635802  | 6.695531  | 19.621290 |
| C  | 2.663475  | 5.465946  | 20.962219 |
| C  | 2.834914  | 5.342982  | 22.181530 |
| H  | 4.961163  | 4.101052  | 23.261320 |
| C  | 3.080114  | 5.186719  | 23.580280 |
| C  | 4.272891  | 4.495476  | 24.022360 |
| H  | 1.290017  | 6.216504  | 24.223970 |
| C  | 2.200600  | 5.689471  | 24.545059 |
| C  | 4.545439  | 4.333569  | 25.363251 |
| H  | 5.458840  | 3.805972  | 25.680460 |

|    |           |           |           |
|----|-----------|-----------|-----------|
| C  | 2.456048  | 5.536842  | 25.941259 |
| C  | 3.658615  | 4.841527  | 26.372089 |
| H  | 0.662547  | 6.571897  | 26.601990 |
| C  | 1.574610  | 6.042757  | 26.921761 |
| C  | 3.913991  | 4.688126  | 27.746210 |
| H  | 4.826372  | 4.160766  | 28.069340 |
| C  | 1.828247  | 5.889392  | 28.295090 |
| C  | 3.030066  | 5.192175  | 28.725479 |
| H  | 0.025376  | 6.929770  | 28.973330 |
| C  | 0.934724  | 6.400267  | 29.296370 |
| C  | 3.277910  | 5.039150  | 30.121269 |
| H  | 4.184711  | 4.513511  | 30.456560 |
| C  | 1.197394  | 6.238305  | 30.637091 |
| C  | 2.388240  | 5.546221  | 31.072599 |
| H  | 0.511386  | 6.630565  | 31.401131 |
| C  | 2.625948  | 5.405266  | 32.468361 |
| C  | 2.771893  | 5.326546  | 33.691132 |
| H  | 4.828506  | 4.186761  | 35.011799 |
| C  | 2.937683  | 5.266075  | 35.101219 |
| H  | 1.079616  | 6.326225  | 35.514729 |
| C  | 4.077153  | 4.640089  | 35.673050 |
| C  | 1.963466  | 5.846563  | 35.957802 |
| C  | 4.245502  | 4.605637  | 37.055241 |
| C  | 2.126960  | 5.814992  | 37.340530 |
| H  | 5.127860  | 4.127167  | 37.502022 |
| C  | 3.272864  | 5.197533  | 37.894562 |
| H  | 1.378727  | 6.266923  | 38.006641 |
| C  | 3.453584  | 5.182463  | 39.308762 |
| N  | 3.612544  | 5.181370  | 40.470749 |
| Au | -0.724966 | 7.682553  | 42.641949 |
| Au | 3.606105  | 10.177030 | 42.643330 |
| Au | 7.934877  | 2.682639  | 42.643471 |
| Au | 7.942450  | 7.684906  | 42.643608 |
| Au | -0.719561 | 2.684559  | 42.643620 |
| Au | 3.607903  | 0.177474  | 42.643749 |
| Au | 0.722606  | 10.184680 | 42.647091 |
| Au | -2.167296 | 5.179262  | 42.647449 |
| Au | 6.498907  | 0.180243  | 42.647869 |
| Au | 0.715712  | 0.181424  | 42.649220 |
| Au | 9.385276  | 5.179575  | 42.649231 |
| Au | 6.492647  | 10.185470 | 42.649410 |
| Au | -5.053050 | 10.182510 | 42.669109 |
| Au | 9.371483  | 0.184644  | 42.669659 |
| Au | -3.600691 | 7.669379  | 42.670872 |

|    |           |           |           |
|----|-----------|-----------|-----------|
| Au | 10.816480 | 2.688867  | 42.671780 |
| Au | -2.150155 | 10.181350 | 42.673470 |
| Au | 12.260530 | 0.184512  | 42.674969 |
| Au | 0.690912  | 5.183866  | 42.677940 |
| Au | 2.146790  | 7.706143  | 42.681068 |
| Au | 2.150884  | 2.653387  | 42.683788 |
| Au | 5.065437  | 2.652747  | 42.686371 |
| Au | 5.069021  | 7.707228  | 42.687931 |
| Au | 6.527435  | 5.184212  | 42.689709 |
| Au | 3.607685  | 5.180587  | 42.735149 |
| Au | -3.602829 | 9.344474  | 45.117249 |
| Au | -0.717121 | 9.341005  | 45.117401 |
| Au | -2.156813 | 6.847729  | 45.117722 |
| Au | 12.259770 | 1.853530  | 45.118099 |
| Au | 3.605677  | 11.839890 | 45.118252 |
| Au | 2.156752  | 4.345395  | 45.118252 |
| Au | 3.606594  | 6.856813  | 45.118370 |
| Au | -2.161996 | 11.844960 | 45.118389 |
| Au | -5.041827 | 11.844580 | 45.118469 |
| Au | 0.720394  | 6.848301  | 45.118801 |
| Au | 9.374409  | 1.850990  | 45.118839 |
| Au | 9.370681  | 6.846999  | 45.118980 |
| Au | 7.931043  | 9.341234  | 45.118980 |
| Au | 5.059321  | 4.343592  | 45.118999 |
| Au | 3.606361  | 1.849347  | 45.119110 |
| Au | 6.493439  | 6.849148  | 45.119251 |
| Au | -0.724478 | 4.344501  | 45.122250 |
| Au | 2.166071  | 9.352364  | 45.122379 |
| Au | 0.713711  | 1.849754  | 45.123211 |
| Au | 6.501266  | 1.847617  | 45.123569 |
| Au | 0.718000  | 11.837330 | 45.123920 |
| Au | 5.045630  | 9.354986  | 45.124210 |
| Au | 10.818450 | 4.356711  | 45.124352 |
| Au | 7.942619  | 4.340755  | 45.124569 |
| Au | 6.496805  | 11.838540 | 45.124660 |
| Au | 2.164889  | 1.019675  | 47.590870 |
| Au | 5.048647  | 1.019675  | 47.590870 |
| Au | 7.932405  | 1.019675  | 47.590870 |
| Au | 10.816160 | 1.019675  | 47.590870 |
| Au | 13.699920 | 1.019675  | 47.590870 |
| Au | 0.723010  | 3.517083  | 47.590870 |
| Au | 3.606768  | 3.517083  | 47.590870 |
| Au | 6.490526  | 3.517083  | 47.590870 |
| Au | 9.374284  | 3.517083  | 47.590870 |

|    |           |           |           |
|----|-----------|-----------|-----------|
| Au | 12.258040 | 3.517083  | 47.590870 |
| Au | -0.718869 | 6.014491  | 47.590870 |
| Au | 2.164889  | 6.014491  | 47.590870 |
| Au | 5.048647  | 6.014491  | 47.590870 |
| Au | 7.932405  | 6.014491  | 47.590870 |
| Au | 10.816160 | 6.014491  | 47.590870 |
| Au | -2.160749 | 8.511899  | 47.590870 |
| Au | 0.723010  | 8.511899  | 47.590870 |
| Au | 3.606768  | 8.511899  | 47.590870 |
| Au | 6.490526  | 8.511899  | 47.590870 |
| Au | 9.374284  | 8.511899  | 47.590870 |
| Au | -3.602628 | 11.009310 | 47.590870 |
| Au | -0.718869 | 11.009310 | 47.590870 |
| Au | 2.164889  | 11.009310 | 47.590870 |
| Au | 5.048647  | 11.009310 | 47.590870 |
| Au | 7.932405  | 11.009310 | 47.590870 |
| Au | 0.723010  | 0.187206  | 49.945450 |
| Au | 3.606768  | 0.187206  | 49.945450 |
| Au | 6.490526  | 0.187206  | 49.945450 |
| Au | 9.374284  | 0.187206  | 49.945450 |
| Au | 12.258040 | 0.187206  | 49.945450 |
| Au | -0.718869 | 2.684613  | 49.945450 |
| Au | 2.164889  | 2.684613  | 49.945450 |
| Au | 5.048647  | 2.684613  | 49.945450 |
| Au | 7.932405  | 2.684613  | 49.945450 |
| Au | 10.816160 | 2.684613  | 49.945450 |
| Au | -2.160749 | 5.182021  | 49.945450 |
| Au | 0.723010  | 5.182021  | 49.945450 |
| Au | 3.606768  | 5.182021  | 49.945450 |
| Au | 6.490526  | 5.182021  | 49.945450 |
| Au | 9.374284  | 5.182021  | 49.945450 |
| Au | -3.602628 | 7.679429  | 49.945450 |
| Au | -0.718869 | 7.679429  | 49.945450 |
| Au | 2.164889  | 7.679429  | 49.945450 |
| Au | 5.048647  | 7.679429  | 49.945450 |
| Au | 7.932405  | 7.679429  | 49.945450 |
| Au | -5.044507 | 10.176840 | 49.945450 |
| Au | -2.160749 | 10.176840 | 49.945450 |
| Au | 0.723010  | 10.176840 | 49.945450 |
| Au | 3.606768  | 10.176840 | 49.945450 |
| Au | 6.490526  | 10.176840 | 49.945450 |
| Au | 0.723010  | 1.852144  | 52.300030 |
| Au | 3.606768  | 1.852144  | 52.300030 |
| Au | 6.490526  | 1.852144  | 52.300030 |

|    |           |           |           |
|----|-----------|-----------|-----------|
| Au | 9.374284  | 1.852144  | 52.300030 |
| Au | 12.258040 | 1.852144  | 52.300030 |
| Au | -0.718869 | 4.349552  | 52.300030 |
| Au | 2.164889  | 4.349552  | 52.300030 |
| Au | 5.048647  | 4.349552  | 52.300030 |
| Au | 7.932405  | 4.349552  | 52.300030 |
| Au | 10.816160 | 4.349552  | 52.300030 |
| Au | -2.160749 | 6.846960  | 52.300030 |
| Au | 0.723010  | 6.846960  | 52.300030 |
| Au | 3.606768  | 6.846960  | 52.300030 |
| Au | 6.490526  | 6.846960  | 52.300030 |
| Au | 9.374284  | 6.846960  | 52.300030 |
| Au | -3.602628 | 9.344368  | 52.300030 |
| Au | -0.718869 | 9.344368  | 52.300030 |
| Au | 2.164889  | 9.344368  | 52.300030 |
| Au | 5.048647  | 9.344368  | 52.300030 |
| Au | 7.932405  | 9.344368  | 52.300030 |
| Au | -5.044507 | 11.841780 | 52.300030 |
| Au | -2.160749 | 11.841780 | 52.300030 |
| Au | 0.723010  | 11.841780 | 52.300030 |
| Au | 3.606768  | 11.841780 | 52.300030 |
| Au | 6.490526  | 11.841780 | 52.300030 |
| Au | 2.164889  | 1.019675  | 54.654610 |
| Au | 5.048647  | 1.019675  | 54.654610 |
| Au | 7.932405  | 1.019675  | 54.654610 |
| Au | 10.816160 | 1.019675  | 54.654610 |
| Au | 13.699920 | 1.019675  | 54.654610 |
| Au | 0.723010  | 3.517083  | 54.654610 |
| Au | 3.606768  | 3.517083  | 54.654610 |
| Au | 6.490526  | 3.517083  | 54.654610 |
| Au | 9.374284  | 3.517083  | 54.654610 |
| Au | 12.258040 | 3.517083  | 54.654610 |
| Au | -0.718869 | 6.014491  | 54.654610 |
| Au | 2.164889  | 6.014491  | 54.654610 |
| Au | 5.048647  | 6.014491  | 54.654610 |
| Au | 7.932405  | 6.014491  | 54.654610 |
| Au | 10.816160 | 6.014491  | 54.654610 |
| Au | -2.160749 | 8.511899  | 54.654610 |
| Au | 0.723010  | 8.511899  | 54.654610 |
| Au | 3.606768  | 8.511899  | 54.654610 |
| Au | 6.490526  | 8.511899  | 54.654610 |
| Au | 9.374284  | 8.511899  | 54.654610 |
| Au | -3.602628 | 11.009310 | 54.654610 |
| Au | -0.718869 | 11.009310 | 54.654610 |

|    |          |           |           |
|----|----------|-----------|-----------|
| Au | 2.164889 | 11.009310 | 54.654610 |
| Au | 5.048647 | 11.009310 | 54.654610 |
| Au | 7.932405 | 11.009310 | 54.654610 |

## 6. The optimized structure for the central region of AH junction (in

### .xyz format)

351

XYZ file

|    |           |           |          |
|----|-----------|-----------|----------|
| Au | 2.177184  | 1.011926  | 1.177289 |
| Au | 5.060942  | 1.011926  | 1.177289 |
| Au | 7.944700  | 1.011926  | 1.177289 |
| Au | 10.828460 | 1.011926  | 1.177289 |
| Au | 13.712220 | 1.011926  | 1.177289 |
| Au | 0.735304  | 3.509334  | 1.177289 |
| Au | 3.619063  | 3.509334  | 1.177289 |
| Au | 6.502821  | 3.509334  | 1.177289 |
| Au | 9.386579  | 3.509334  | 1.177289 |
| Au | 12.270340 | 3.509334  | 1.177289 |
| Au | -0.706575 | 6.006742  | 1.177289 |
| Au | 2.177184  | 6.006742  | 1.177289 |
| Au | 5.060942  | 6.006742  | 1.177289 |
| Au | 7.944700  | 6.006742  | 1.177289 |
| Au | 10.828460 | 6.006742  | 1.177289 |
| Au | -2.148454 | 8.504150  | 1.177289 |
| Au | 0.735304  | 8.504150  | 1.177289 |
| Au | 3.619063  | 8.504150  | 1.177289 |
| Au | 6.502821  | 8.504150  | 1.177289 |
| Au | 9.386579  | 8.504150  | 1.177289 |
| Au | -3.590333 | 11.001560 | 1.177289 |
| Au | -0.706575 | 11.001560 | 1.177289 |
| Au | 2.177184  | 11.001560 | 1.177289 |
| Au | 5.060942  | 11.001560 | 1.177289 |
| Au | 7.944700  | 11.001560 | 1.177289 |
| Au | 0.735304  | 1.844395  | 3.531868 |
| Au | 3.619063  | 1.844395  | 3.531868 |
| Au | 6.502821  | 1.844395  | 3.531868 |
| Au | 9.386579  | 1.844395  | 3.531868 |
| Au | 12.270340 | 1.844395  | 3.531868 |
| Au | -0.706575 | 4.341803  | 3.531868 |
| Au | 2.177184  | 4.341803  | 3.531868 |
| Au | 5.060942  | 4.341803  | 3.531868 |
| Au | 7.944700  | 4.341803  | 3.531868 |

|    |           |           |          |
|----|-----------|-----------|----------|
| Au | 10.828460 | 4.341803  | 3.531868 |
| Au | -2.148454 | 6.839211  | 3.531868 |
| Au | 0.735304  | 6.839211  | 3.531868 |
| Au | 3.619063  | 6.839211  | 3.531868 |
| Au | 6.502821  | 6.839211  | 3.531868 |
| Au | 9.386579  | 6.839211  | 3.531868 |
| Au | -3.590333 | 9.336619  | 3.531868 |
| Au | -0.706575 | 9.336619  | 3.531868 |
| Au | 2.177184  | 9.336619  | 3.531868 |
| Au | 5.060942  | 9.336619  | 3.531868 |
| Au | 7.944700  | 9.336619  | 3.531868 |
| Au | -5.032212 | 11.834030 | 3.531868 |
| Au | -2.148454 | 11.834030 | 3.531868 |
| Au | 0.735304  | 11.834030 | 3.531868 |
| Au | 3.619063  | 11.834030 | 3.531868 |
| Au | 6.502821  | 11.834030 | 3.531868 |
| Au | 0.735304  | 0.179457  | 5.886447 |
| Au | 3.619063  | 0.179457  | 5.886447 |
| Au | 6.502821  | 0.179457  | 5.886447 |
| Au | 9.386579  | 0.179457  | 5.886447 |
| Au | 12.270340 | 0.179457  | 5.886447 |
| Au | -0.706575 | 2.676864  | 5.886447 |
| Au | 2.177184  | 2.676864  | 5.886447 |
| Au | 5.060942  | 2.676864  | 5.886447 |
| Au | 7.944700  | 2.676864  | 5.886447 |
| Au | 10.828460 | 2.676864  | 5.886447 |
| Au | -2.148454 | 5.174272  | 5.886447 |
| Au | 0.735304  | 5.174272  | 5.886447 |
| Au | 3.619063  | 5.174272  | 5.886447 |
| Au | 6.502821  | 5.174272  | 5.886447 |
| Au | 9.386579  | 5.174272  | 5.886447 |
| Au | -3.590333 | 7.671680  | 5.886447 |
| Au | -0.706575 | 7.671680  | 5.886447 |
| Au | 2.177184  | 7.671680  | 5.886447 |
| Au | 5.060942  | 7.671680  | 5.886447 |
| Au | 7.944700  | 7.671680  | 5.886447 |
| Au | -5.032212 | 10.169090 | 5.886447 |
| Au | -2.148454 | 10.169090 | 5.886447 |
| Au | 0.735304  | 10.169090 | 5.886447 |
| Au | 3.619063  | 10.169090 | 5.886447 |
| Au | 6.502821  | 10.169090 | 5.886447 |
| Au | 2.177184  | 1.011926  | 8.241026 |
| Au | 5.060942  | 1.011926  | 8.241026 |
| Au | 7.944700  | 1.011926  | 8.241026 |

|    |           |           |           |
|----|-----------|-----------|-----------|
| Au | 10.828460 | 1.011926  | 8.241026  |
| Au | 13.712220 | 1.011926  | 8.241026  |
| Au | 0.735304  | 3.509334  | 8.241026  |
| Au | 3.619063  | 3.509334  | 8.241026  |
| Au | 6.502821  | 3.509334  | 8.241026  |
| Au | 9.386579  | 3.509334  | 8.241026  |
| Au | 12.270340 | 3.509334  | 8.241026  |
| Au | -0.706575 | 6.006742  | 8.241026  |
| Au | 2.177184  | 6.006742  | 8.241026  |
| Au | 5.060942  | 6.006742  | 8.241026  |
| Au | 7.944700  | 6.006742  | 8.241026  |
| Au | 10.828460 | 6.006742  | 8.241026  |
| Au | -2.148454 | 8.504150  | 8.241026  |
| Au | 0.735304  | 8.504150  | 8.241026  |
| Au | 3.619063  | 8.504150  | 8.241026  |
| Au | 6.502821  | 8.504150  | 8.241026  |
| Au | 9.386579  | 8.504150  | 8.241026  |
| Au | -3.590333 | 11.001560 | 8.241026  |
| Au | -0.706575 | 11.001560 | 8.241026  |
| Au | 2.177184  | 11.001560 | 8.241026  |
| Au | 5.060942  | 11.001560 | 8.241026  |
| Au | 7.944700  | 11.001560 | 8.241026  |
| Au | 0.725397  | 11.830620 | 10.681580 |
| Au | 10.811320 | 4.345786  | 10.684260 |
| Au | 12.261730 | 1.827765  | 10.687060 |
| Au | 6.500106  | 1.838451  | 10.687130 |
| Au | 3.621722  | 11.825800 | 10.687710 |
| Au | 0.725966  | 1.855789  | 10.692600 |
| Au | 7.942184  | 4.348103  | 10.693030 |
| Au | -0.738315 | 4.322762  | 10.694980 |
| Au | 3.626636  | 1.856816  | 10.696510 |
| Au | 5.052179  | 9.334239  | 10.698740 |
| Au | -2.156041 | 11.831550 | 10.699090 |
| Au | 9.384617  | 6.844970  | 10.699140 |
| Au | 6.509838  | 11.830250 | 10.701620 |
| Au | 7.935261  | 9.329471  | 10.703820 |
| Au | 6.493745  | 6.830036  | 10.703960 |
| Au | -2.135112 | 6.829115  | 10.704350 |
| Au | -0.697063 | 9.331283  | 10.704590 |
| Au | -3.576278 | 9.328752  | 10.705070 |
| Au | -5.031036 | 11.855330 | 10.706810 |
| Au | 9.380854  | 1.842990  | 10.715940 |
| Au | 5.070434  | 4.336573  | 10.723440 |
| Au | 2.175216  | 9.337390  | 10.725770 |



|    |           |           |           |
|----|-----------|-----------|-----------|
| Au | 0.744558  | 6.836109  | 10.728600 |
| Au | 3.603702  | 6.837721  | 10.731460 |
| Au | 2.178820  | 4.355140  | 10.737150 |
| Au | 0.596493  | 5.105421  | 13.107140 |
| Au | -5.033571 | 10.173440 | 13.111300 |
| Au | 2.178359  | 2.638565  | 13.123900 |
| Au | 5.102294  | 7.698592  | 13.127030 |
| Au | -0.747993 | 7.700899  | 13.145480 |
| Au | 10.823460 | 2.672675  | 13.147720 |
| Au | 9.383927  | 0.178774  | 13.148030 |
| Au | 7.949513  | 2.672977  | 13.152190 |
| Au | -3.603082 | 7.668050  | 13.164880 |
| Au | 6.507853  | 0.182141  | 13.166530 |
| Au | 6.505591  | 10.184890 | 13.167380 |
| Au | 0.722853  | 0.176747  | 13.167790 |
| Au | 3.761212  | 5.104531  | 13.168370 |
| Au | 3.631446  | 0.174952  | 13.169510 |
| Au | 12.270530 | 0.182348  | 13.170190 |
| Au | -2.150214 | 10.189790 | 13.170400 |
| Au | 7.956607  | 7.668753  | 13.170730 |
| Au | 9.386725  | 5.174398  | 13.172760 |
| Au | -0.735109 | 2.637760  | 13.184440 |
| Au | 3.643488  | 10.215430 | 13.185110 |
| Au | 0.713144  | 10.209800 | 13.188260 |
| Au | -2.207893 | 5.171210  | 13.188760 |
| Au | 5.091536  | 2.634373  | 13.190770 |
| Au | 2.177420  | 7.794379  | 13.192490 |
| Au | 6.564329  | 5.171689  | 13.202270 |
| S  | 2.217525  | 6.009246  | 14.937020 |
| C  | 2.486243  | 6.499921  | 16.626289 |
| H  | 4.471044  | 5.624685  | 16.740191 |
| H  | 0.533779  | 7.446477  | 16.787470 |
| C  | 3.676760  | 6.144906  | 17.297750 |
| C  | 1.455793  | 7.171583  | 17.322969 |
| C  | 3.834350  | 6.463013  | 18.649460 |
| C  | 1.618076  | 7.485671  | 18.673559 |
| H  | 4.760845  | 6.189975  | 19.175400 |
| H  | 0.819251  | 8.008995  | 19.219000 |
| C  | 2.811101  | 7.140921  | 19.363800 |
| C  | 2.979586  | 7.484190  | 20.739901 |
| C  | 3.122866  | 7.800301  | 21.925091 |
| C  | 3.302321  | 8.173193  | 23.293570 |
| H  | 5.284668  | 7.294945  | 23.443199 |
| H  | 1.357270  | 9.133471  | 23.480410 |

|    |           |           |           |
|----|-----------|-----------|-----------|
| C  | 4.498320  | 7.846826  | 23.979750 |
| C  | 2.292844  | 8.877031  | 23.996920 |
| C  | 4.690716  | 8.215769  | 25.317350 |
| C  | 2.484502  | 9.234501  | 25.334591 |
| H  | 6.519335  | 7.065783  | 25.552731 |
| H  | 1.689163  | 9.776235  | 25.871031 |
| H  | 6.651312  | 8.779996  | 26.002720 |
| C  | 3.676805  | 8.915205  | 26.007660 |
| C  | 5.976336  | 7.891980  | 26.053120 |
| C  | 3.911829  | 9.305227  | 27.452650 |
| H  | 4.476233  | 10.268340 | 27.481911 |
| C  | 5.730059  | 7.561323  | 27.509140 |
| H  | 7.276846  | 6.042829  | 27.644911 |
| H  | 2.949975  | 9.499342  | 27.968571 |
| C  | 6.489758  | 6.590493  | 28.186609 |
| C  | 4.712921  | 8.258100  | 28.199970 |
| C  | 6.260291  | 6.310771  | 29.535339 |
| C  | 4.474192  | 7.975107  | 29.549641 |
| H  | 6.854020  | 5.551569  | 30.064159 |
| H  | 3.680849  | 8.506204  | 30.097309 |
| C  | 5.244913  | 7.005800  | 30.234751 |
| C  | 4.998647  | 6.733833  | 31.609421 |
| C  | 4.788488  | 6.505715  | 32.801960 |
| C  | 4.544608  | 6.236968  | 34.173710 |
| H  | 2.902985  | 7.657801  | 34.325611 |
| H  | 6.141114  | 4.766598  | 34.332581 |
| C  | 3.507560  | 6.916472  | 34.864521 |
| C  | 5.334800  | 5.284457  | 34.868469 |
| C  | 3.255413  | 6.643534  | 36.205669 |
| C  | 5.088854  | 5.006115  | 36.209610 |
| H  | 2.452061  | 7.163309  | 36.746269 |
| H  | 5.694760  | 4.267846  | 36.753281 |
| C  | 4.041240  | 5.679879  | 36.879711 |
| C  | 3.756279  | 5.364443  | 38.235760 |
| N  | 3.482988  | 5.062875  | 39.336559 |
| Au | -0.724275 | 7.688813  | 41.453079 |
| Au | 7.933587  | 2.684952  | 41.453541 |
| Au | 3.609183  | 0.176419  | 41.453819 |
| Au | 3.604699  | 10.177230 | 41.454300 |
| Au | -0.725702 | 2.683494  | 41.455441 |
| Au | 9.379328  | 5.178899  | 41.458881 |
| Au | -2.174950 | 5.177971  | 41.459332 |
| Au | 7.934064  | 7.680178  | 41.459412 |
| Au | 0.719449  | 10.184060 | 41.461170 |

|    |           |           |           |
|----|-----------|-----------|-----------|
| Au | 6.485388  | 10.183560 | 41.461578 |
| Au | 0.706844  | 0.177651  | 41.461739 |
| Au | 6.495777  | 0.177807  | 41.462780 |
| Au | -2.154974 | 10.181220 | 41.477249 |
| Au | 5.063005  | 7.704872  | 41.477989 |
| Au | 2.145758  | 7.706596  | 41.479382 |
| Au | 10.814480 | 2.688063  | 41.480122 |
| Au | 6.520823  | 5.180980  | 41.481628 |
| Au | 12.255800 | 0.187429  | 41.483589 |
| Au | 5.063015  | 2.651833  | 41.491211 |
| Au | -5.057354 | 10.184070 | 41.495640 |
| Au | -3.601952 | 7.669180  | 41.496181 |
| Au | 9.367071  | 0.184912  | 41.496521 |
| Au | 0.684290  | 5.183219  | 41.507252 |
| Au | 2.144824  | 2.648389  | 41.513279 |
| Au | 3.607324  | 5.183095  | 41.587421 |
| Au | -3.603359 | 9.346104  | 43.928310 |
| Au | 0.721516  | 6.849962  | 43.929619 |
| Au | 3.608468  | 1.850654  | 43.930038 |
| Au | 3.601791  | 6.856511  | 43.931438 |
| Au | 3.605022  | 11.838400 | 43.931511 |
| Au | 9.371371  | 1.855978  | 43.931671 |
| Au | -2.157850 | 6.847232  | 43.931740 |
| Au | 7.927765  | 9.340732  | 43.931820 |
| Au | 9.367847  | 6.846711  | 43.932381 |
| Au | -5.044918 | 11.846720 | 43.932529 |
| Au | 12.250510 | 1.850205  | 43.932739 |
| Au | -0.719453 | 9.342243  | 43.933262 |
| Au | 6.485506  | 6.846103  | 43.933300 |
| Au | 5.055558  | 4.342436  | 43.933460 |
| Au | 7.932442  | 4.347576  | 43.933472 |
| Au | -2.164269 | 11.843410 | 43.934422 |
| Au | 5.043424  | 9.346620  | 43.934509 |
| Au | 2.163964  | 9.350228  | 43.935619 |
| Au | 10.809980 | 4.356187  | 43.936611 |
| Au | 6.497879  | 1.849990  | 43.936840 |
| Au | 0.716535  | 11.838390 | 43.937191 |
| Au | 6.489827  | 11.834460 | 43.938042 |
| Au | -0.734508 | 4.341495  | 43.938141 |
| Au | 0.703986  | 1.844576  | 43.940620 |
| Au | 2.141971  | 4.338135  | 43.955742 |
| Au | 2.162493  | 1.019936  | 46.404781 |
| Au | 5.046251  | 1.019936  | 46.404781 |
| Au | 7.930009  | 1.019936  | 46.404781 |

|    |           |           |           |
|----|-----------|-----------|-----------|
| Au | 10.813770 | 1.019936  | 46.404781 |
| Au | 13.697530 | 1.019936  | 46.404781 |
| Au | 0.720614  | 3.517344  | 46.404781 |
| Au | 3.604372  | 3.517344  | 46.404781 |
| Au | 6.488130  | 3.517344  | 46.404781 |
| Au | 9.371888  | 3.517344  | 46.404781 |
| Au | 12.255650 | 3.517344  | 46.404781 |
| Au | -0.721266 | 6.014751  | 46.404781 |
| Au | 2.162493  | 6.014751  | 46.404781 |
| Au | 5.046251  | 6.014751  | 46.404781 |
| Au | 7.930009  | 6.014751  | 46.404781 |
| Au | 10.813770 | 6.014751  | 46.404781 |
| Au | -2.163145 | 8.512159  | 46.404781 |
| Au | 0.720614  | 8.512159  | 46.404781 |
| Au | 3.604372  | 8.512159  | 46.404781 |
| Au | 6.488130  | 8.512159  | 46.404781 |
| Au | 9.371888  | 8.512159  | 46.404781 |
| Au | -3.605024 | 11.009570 | 46.404781 |
| Au | -0.721266 | 11.009570 | 46.404781 |
| Au | 2.162493  | 11.009570 | 46.404781 |
| Au | 5.046251  | 11.009570 | 46.404781 |
| Au | 7.930009  | 11.009570 | 46.404781 |
| Au | 0.720614  | 0.187466  | 48.759361 |
| Au | 3.604372  | 0.187466  | 48.759361 |
| Au | 6.488130  | 0.187466  | 48.759361 |
| Au | 9.371888  | 0.187466  | 48.759361 |
| Au | 12.255650 | 0.187466  | 48.759361 |
| Au | -0.721266 | 2.684874  | 48.759361 |
| Au | 2.162493  | 2.684874  | 48.759361 |
| Au | 5.046251  | 2.684874  | 48.759361 |
| Au | 7.930009  | 2.684874  | 48.759361 |
| Au | 10.813770 | 2.684874  | 48.759361 |
| Au | -2.163145 | 5.182282  | 48.759361 |
| Au | 0.720614  | 5.182282  | 48.759361 |
| Au | 3.604372  | 5.182282  | 48.759361 |
| Au | 6.488130  | 5.182282  | 48.759361 |
| Au | 9.371888  | 5.182282  | 48.759361 |
| Au | -3.605024 | 7.679690  | 48.759361 |
| Au | -0.721266 | 7.679690  | 48.759361 |
| Au | 2.162493  | 7.679690  | 48.759361 |
| Au | 5.046251  | 7.679690  | 48.759361 |
| Au | 7.930009  | 7.679690  | 48.759361 |
| Au | -5.046903 | 10.177100 | 48.759361 |
| Au | -2.163145 | 10.177100 | 48.759361 |

|    |           |           |           |
|----|-----------|-----------|-----------|
| Au | 0.720614  | 10.177100 | 48.759361 |
| Au | 3.604372  | 10.177100 | 48.759361 |
| Au | 6.488130  | 10.177100 | 48.759361 |
| Au | 0.720614  | 1.852405  | 51.113941 |
| Au | 3.604372  | 1.852405  | 51.113941 |
| Au | 6.488130  | 1.852405  | 51.113941 |
| Au | 9.371888  | 1.852405  | 51.113941 |
| Au | 12.255650 | 1.852405  | 51.113941 |
| Au | -0.721266 | 4.349813  | 51.113941 |
| Au | 2.162493  | 4.349813  | 51.113941 |
| Au | 5.046251  | 4.349813  | 51.113941 |
| Au | 7.930009  | 4.349813  | 51.113941 |
| Au | 10.813770 | 4.349813  | 51.113941 |
| Au | -2.163145 | 6.847221  | 51.113941 |
| Au | 0.720614  | 6.847221  | 51.113941 |
| Au | 3.604372  | 6.847221  | 51.113941 |
| Au | 6.488130  | 6.847221  | 51.113941 |
| Au | 9.371888  | 6.847221  | 51.113941 |
| Au | -3.605024 | 9.344629  | 51.113941 |
| Au | -0.721266 | 9.344629  | 51.113941 |
| Au | 2.162493  | 9.344629  | 51.113941 |
| Au | 5.046251  | 9.344629  | 51.113941 |
| Au | 7.930009  | 9.344629  | 51.113941 |
| Au | -5.046903 | 11.842040 | 51.113941 |
| Au | -2.163145 | 11.842040 | 51.113941 |
| Au | 0.720614  | 11.842040 | 51.113941 |
| Au | 3.604372  | 11.842040 | 51.113941 |
| Au | 6.488130  | 11.842040 | 51.113941 |
| Au | 2.162493  | 1.019936  | 53.468510 |
| Au | 5.046251  | 1.019936  | 53.468510 |
| Au | 7.930009  | 1.019936  | 53.468510 |
| Au | 10.813770 | 1.019936  | 53.468510 |
| Au | 13.697530 | 1.019936  | 53.468510 |
| Au | 0.720614  | 3.517344  | 53.468510 |
| Au | 3.604372  | 3.517344  | 53.468510 |
| Au | 6.488130  | 3.517344  | 53.468510 |
| Au | 9.371888  | 3.517344  | 53.468510 |
| Au | 12.255650 | 3.517344  | 53.468510 |
| Au | -0.721266 | 6.014751  | 53.468510 |
| Au | 2.162493  | 6.014751  | 53.468510 |
| Au | 5.046251  | 6.014751  | 53.468510 |
| Au | 7.930009  | 6.014751  | 53.468510 |
| Au | 10.813770 | 6.014751  | 53.468510 |
| Au | -2.163145 | 8.512159  | 53.468510 |

|    |           |           |           |
|----|-----------|-----------|-----------|
| Au | 0.720614  | 8.512159  | 53.468510 |
| Au | 3.604372  | 8.512159  | 53.468510 |
| Au | 6.488130  | 8.512159  | 53.468510 |
| Au | 9.371888  | 8.512159  | 53.468510 |
| Au | -3.605024 | 11.009570 | 53.468510 |
| Au | -0.721266 | 11.009570 | 53.468510 |
| Au | 2.162493  | 11.009570 | 53.468510 |
| Au | 5.046251  | 11.009570 | 53.468510 |
| Au | 7.930009  | 11.009570 | 53.468510 |
